# 1 Handwashing Practices among New Mothers and their Guardians: A Mixed-Methods 2 Observational Study in Healthcare Facilities and Households in Rural Malawi

3 Kondwani Luwe<sup>1</sup>, Kondwani Chidziwisano<sup>1</sup>, Katherine Davies<sup>3</sup>, Tracy Morse<sup>2</sup> and Robert  
4 Dreibelbis<sup>3</sup>

5 1. Centre for Water, Sanitation, Health and Appropriate Technology Development (WASHTED), Malawi  
6 University of Business and Applied Sciences

7 2. Department of Civil and Environmental Engineering, University of Strathclyde

8 3. Department of Disease Control, London School of Hygiene & Tropical Medicine (LSHTM)

## 9 Abstract

10 **Background:** Patient guardians perform hygiene-related roles during postnatal care but are often  
11 overlooked in hygiene Interventions. This study examined perceived facilitators and barriers to  
12 handwashing behaviour among Malawian new mothers and their guardians in healthcare facilities and  
13 households.

14 **Methods:** This cross-sectional study was conducted in Postnatal Care (PNC) wards (n=2) and  
15 households (n=20) in two districts in Malawi. In the PNC wards, 15 mother/guardian pairs were  
16 observed and interviewed. In the households 20 new mothers were observed and interviewed while  
17 15 of their guardians were interviewed and/or observed. Water, sanitation and hygiene facilities,  
18 handwashing opportunities and actions were documented and analysed using Stata. Behaviour  
19 determinants were assessed using the Capabilities, Opportunities and Motivation model in NVivo 14.

20 **Results:** PNC wards had Handwashing Facilities (HWFs) without soap. Hand rinsing with water only  
21 was observed in 20% of all hand hygiene opportunities in the wards (n = 41), with guardians practising  
22 it more than mothers. 90% of households lacked HWF. Baby care activities were integrated with  
23 chores. Hands were rinsed with water only in 38% of all hand hygiene opportunities (n = 128); before  
24 eating (91%), preparing food (36%) and breastfeeding (13%).

25 Participants knew the importance of handwashing but mothers in wards reported being too tired to  
26 get out of bed to wash their hands. The HWFs presented opportunities for handwashing but practice  
27 was limited by intermittent water supply, restricted access and soap absence. Participants expressed  
28 motivation to buy soap but didn't prioritise it for handwashing. Mothers often prioritised pacifying  
29 their crying newborns and forgot to wash their hands. Guardians were frequently excluded from  
30 health promotion activities at the facility.

31 **Discussion:** Context-specific behaviour change interventions among new mothers and their guardians  
32 are needed. Utilising guardians' support; placing HWFs and reminders strategically; and having  
33 innovative approaches to promote soap use should be promoted.

## 34 **1.0. Introduction**

35 Every year across the globe, approximately 2.4 million neonatal deaths occur during the first month  
36 of life and 287,000 maternal deaths occur during and following pregnancy or childbirth (1,2). Sub-  
37 Saharan Africa suffers a disproportionate burden of these deaths; over half of all neonatal and  
38 maternal deaths occur in the region (3). Infection remains a leading cause of these deaths contributing  
39 to approximately fifty and ten percent of global infant and maternal deaths respectively (4,5). World  
40 Health Organization (WHO) guidelines recommend handwashing with soap at critical times specific to  
41 neonatal care: before and or after touching newborns or mothers, caring for the cord, preparing food,  
42 breastfeeding, changing the diaper and using the toilet (6–11).

43 Interventions aimed at improving handwashing with soap during the postnatal period often focus on  
44 health workers (12,13) and mothers (14,15) within healthcare facilities. Postnatal care however  
45 extends to the household (16–21). Patient guardians are important participants in this continuum of  
46 care (14,15,22). Patient guardians - usually relatives, neighbours or friends to patients - are an  
47 important part of the health system in low- and middle-income countries (LMICs) (23). They provide  
48 person-centred care in healthcare facilities and households such as administering drugs, cleaning and  
49 dressing wounds, cooking and serving food, doing laundry, and caring for infants (cord care and nappy  
50 changing) (24–27). Despite their significance, few infection prevention and control (IPC) guidelines  
51 acknowledge their role or include them in IPC strategies, health education programmes or  
52 interventions during postnatal care (28).

53 The few interventions that target new mothers and their guardians in healthcare facilities and  
54 households still face challenges relating to handwashing infrastructure/consumables and behaviour.  
55 In both healthcare facilities and homes, handwashing facilities (buckets, jugs, basins, sinks and tippy  
56 taps) are limited or non-functional and rarely located in a convenient position (next to patient beds,  
57 toilets or kitchens) (20,27,29–33). Handwashing practice also remains low (15,20,34,35) and is  
58 influenced by a range of behavioural determinants including knowledge of handwashing with soap;  
59 risk perception of disease; protection of infants (nurture); social-cultural norms or perceived social  
60 approval (affiliation); forgetfulness; time constraints; and lack of soap due to financial constraints  
61 (15,36–42).

62 Studies that further document handwashing behaviours and their determinants during the postnatal  
63 period are still warranted; especially those that extend to the household setting and incorporate the  
64 patient's guardians. This observational study examines handwashing practices and their determinants  
65 among Malawian new mothers and their guardians in healthcare facilities and home environments.  
66 The results can inform interventions and IPC strategies that are more effective for their similar local  
67 contexts.

68

## 69 **2.0. Methods**

### 70 **2.1. Study setting**

71 The study was conducted in Malawi, a country in Sub-Saharan Africa with a neonatal mortality rate of  
72 19 deaths per 1,000 live births and a maternal mortality ratio of 381 deaths per 100,000 live births  
73 (43,44). The research took place in Postnatal Care (PNC) wards and households in the catchment areas  
74 of two healthcare facilities in the Southern region of Malawi, one being managed by the government  
75 in Mwanza district and the other by a Faith-Based Organisation (FBO) in Phalombe district. Both were  
76 randomly selected from a list of major healthcare facilities, and each had a capacity of 32 beds in the  
77 PNC wards. However, the government healthcare facility was reported to handle an average of more  
78 deliveries per week (79 normal deliveries) compared to the one operated by the faith-based  
79 organisation (28 normal deliveries). Data were collected at both the healthcare facilities (PNC wards)  
80 and households to comprehensively understand handwashing practices and factors that influence the  
81 continuum of care for both new mothers and their guardians (45,46).

### 82 **2.2. Study design**

83 This mixed-method observational study followed an explanatory sequential design in which  
84 quantitative observations (direct and structured) informed subsequent in-depth qualitative data  
85 collection (semi-structured interviews) at the healthcare facility and household.

### 86 **2.3. Study population and sampling**

87 New mothers and their guardians in the PNC wards were conveniently sampled and approached to  
88 participate in the study for observations and interviews. At the household, new mothers who had  
89 given birth in less than 28 days (different from those targeted in the PNC wards) were randomly  
90 selected from the birth register, followed up (with assistance from health staff) and approached to  
91 take part in the study for both observations and interviews. Their guardians who had helped care for  
92 them while at the PNC ward were also recruited. The study included mothers who underwent a normal  
93 delivery and were at least 18 years of age at the time of delivery.

### 94 **2.4. Data collection**

95 Data collection occurred between November 2022 and January 2023 through quantitative methods  
96 (checklists and structured observations) and qualitative methods (semi-structured interviews).

#### 97 **2.4.1. Quantitative data collection**

##### 98 ***Facility checklists***

99 Facility checklists focusing on water, sanitation, and hygiene infrastructure and materials were  
100 collected at both facilities and at the households of all mothers who participated in household data  
101 collection (n=20). The checklists assessed water accessibility (availability of water on or off the  
102 premises, distance to water source and the type of water source), toilet facilities (presence, type of

103 toilets and their cleanliness), and handwashing facilities (HWFs) (presence/ absence, type of facilities  
104 and availability of handwashing materials such as soap).

### 105 ***Structured observations***

106 Observations were conducted with new mothers and their guardians in PNC wards at both facilities.  
107 The observations, which lasted three hours (9am to 12 noon), were conducted by two female  
108 enumerators. One enumerator was assigned to observe the new mother and the other to observe the  
109 guardian. Hand hygiene opportunities were recorded along with associated hand hygiene behaviours  
110 – specifically if soap was used; if only water was used; or if hands were not washed at all. The type of  
111 handwashing facility used was also recorded together with other relevant notes about the observed  
112 practice e.g. the context and activities done before and after the observed critical times for  
113 handwashing.

114 Similar observations were conducted in households, primarily on new mothers and lasted for  
115 approximately 4 hours (9 am to 1 pm). In cases where guardians resided in the homes of the targeted  
116 new mother, they were also observed.

## 117 **2.4.2. Qualitative data collection**

### 118 ***Semi-structured interviews***

119 After the observations, the female enumerators who conducted the observations met with other  
120 enumerators (male) and a member of the study management team (KL) to debrief on the findings.  
121 Immediately after the debrief, semi-structured interviews were conducted with mothers and  
122 guardians. Interviews were conducted in the local language (Chichewa) by the two male enumerators  
123 with Bachelor's degrees in Environmental Health, and prior experience in conducting qualitative  
124 research. They all received a week-long training specific to the current study. At the healthcare facility,  
125 the interviews were conducted either within or outside the wards, depending on the situation  
126 concerning privacy. The participants were asked about their handwashing practices such as barriers  
127 and enablers, and reasons for or against washing their hands.

## 128 **2.5. Data processing and analysis**

129 The data collected from checklists and observations using Kobo collect was analysed using StataBE 17  
130 (Stata Corp, College Station, TX, USA). Descriptive statistics were used to obtain the means and  
131 frequencies or proportions of continuous and discrete data respectively.

132 The interviews were recorded, transcribed, and translated into English. Determinants of handwashing  
133 behaviours were assessed using the Capabilities, Opportunities, and Motivation model of Behaviour  
134 change (COM-B) (47) in NVivo 14(QSR International, Lumivero). The research team organized the  
135 responses from the participants into the main areas of the COM-B framework. These were then  
136 reviewed and categorized as either facilitators or barriers for postnatal care and household settings.  
137 Key themes from the results were identified and combined for both settings. In addition, some field  
138 notes from observations were used to further explain and validate the overall results.

139 **2.6. Ethical considerations**

140 Ethical approval for the study was obtained from the London School of Hygiene and Tropical Medicine,  
141 and the National Committee on Research in the Social Sciences and Humanities (Malawi)  
142 (NCST/RTT/2/6., P.09/22/672). Before collecting any data, each participant was asked to provide  
143 voluntary written consent. To ensure privacy, female enumerators were assigned to perform  
144 observations in the PNC ward, as some women had recently given birth.

145 **3.0. Results**

146 **3.1. Demographics**

147 A total of 35 mothers and 30 guardians participated in the study. This included PNC ward observations  
148 and interviews from 9 mother/guardian pairs from the government-run healthcare facility and 6 from  
149 the FBO-operated healthcare facility. For household observations and interviews, 10 mothers  
150 participated from the government-run facility in Mwanza district and 10 from the FBO-operated  
151 healthcare facility in Phalombe district. In 8 of the 20 households, the guardian at the time of study  
152 lived with the mother and the guardian participated in both the observations and the interviews. In 7  
153 of the 20 households, the guardian resided elsewhere and was only interviewed. In the remaining 5  
154 of the 20 households, the guardians were not available to participate.

155 The mothers were generally younger (mean age 24.4 years, SD = 7.2) than the guardians (mean age  
156 42.5 years, SD 10.3). All new mothers had at least completed primary education; 33.3% of guardians  
157 had no formal education. Most of the new mothers (97%) were married, while approximately a third  
158 of the guardians were widowed or divorced (34%) (Table 1).

159 **Table 1: Demographics for the New Mothers and Guardians across both healthcare facilities**

| Demographic      |              | PNC (n =30)    |                  | Household (n =35) |                  |
|------------------|--------------|----------------|------------------|-------------------|------------------|
|                  |              | Mother (n =15) | Guardian (n =15) | Mother (n =20)    | Guardian (n =15) |
| Age              | Mean (SD)    | 23.2 (6.2)     | 44.2(10.9)       | 25.6(8.1)         | 40.9(9.2)        |
| Education %      | No education | .              | 46.7             | .                 | 20.0             |
|                  | Primary      | 73.3           | 46.7             | 50.0              | 46.7             |
|                  | Secondary    | 26.7           | 6.7              | 50.0              | 33.3             |
| Marital status % | Single       | 6.7            | .                | .                 | .                |
|                  | Married      | 93.3           | 53.3             | 100               | 66.7             |
|                  | Widow        | .              | 20.0             | .                 | 13.3             |
|                  | Divorced     | .              | 26.7             | .                 | 20.0             |

160 **3.2. WASH conditions and hand hygiene in PNC wards**

161 **3.2.1. WASH conditions at the PNC wards**

162 Both facilities had piped water supply into the PNC ward. Each PNC ward had three pour flush toilets  
163 but were generally cleaner in the FBO than in the government-operated health facility. The PNC ward  
164 toilets in the government-operated health facility had piped water to sinks with drains for  
165 handwashing facilities however there was no running water at the time of the study. In the FBO-run  
166 facility, a standpipe outside the toilets was used as a handwashing facility and had running water at  
167 the time (Table 2).

168 The government-run facility had 7 handwashing facilities (6 sinks and 1 bucket with tap) within the  
169 PNC ward and the FBO-operated facility had 2 (sinks); in both facilities, soap was not available. Both  
170 PNC wards had different posters at HWF stations and the general ward area, which displayed  
171 messages on steps, critical times, and general reminders for handwashing with soap. (Table 2).

172 **Table 2: WASH facilities at the PNC wards across the two sites**

| WASH facilities at the PNC                               |                 | Government-run<br>Healthcare facility | FBO-run<br>Healthcare facility |
|----------------------------------------------------------|-----------------|---------------------------------------|--------------------------------|
| <b>Location: Toilets within the PNC wards</b>            |                 |                                       |                                |
| Number of toilets                                        |                 | 3                                     | 3                              |
| Type of Toilets                                          | Pour Flush      | 3                                     | 3                              |
| Condition of toilets                                     | Clean           | 2                                     | 3                              |
|                                                          | Unclean         | 1                                     | .                              |
| Number of handwashing facilities                         |                 | 3                                     | 3                              |
| Handwashing facilities type                              | Sink with drain | 3                                     | .                              |
|                                                          | Standpipe       | .                                     | 1                              |
| Hand washing materials at HWFs                           | Water only      | .                                     | 1                              |
|                                                          | No water        | 3                                     | .                              |
|                                                          | Soap            | .                                     | .                              |
| <b>Location: PNC ward accommodation or sleeping area</b> |                 |                                       |                                |
| Number of handwashing facilities                         |                 | 7                                     | 2                              |
| Handwashing facilities type                              | Sink with drain | 6                                     | 2                              |
|                                                          | Bucket with tap | 1                                     | .                              |
| Handwashing materials at handwashing facilities          | Water only      | 5                                     | 2                              |
|                                                          | No water        | 2                                     | .                              |
|                                                          | Soap            | .                                     | .                              |
| Posters on handwashing                                   | Present         | 5                                     | 2                              |
|                                                          | Absent          | 2                                     | .                              |

### 173 3.2.2. Hand hygiene opportunities and actions in PNC wards

174 Although handwashing facilities were available in the PNC wards of both healthcare facilities, very few  
175 people utilised them. A total of 41 handwashing opportunities were observed across all observations  
176 (Table 3). Few handwashing opportunities were recorded because most mothers were inactive and  
177 spent most of their time sleeping with their guardians sitting beside them. Occasionally, the mothers  
178 would wake up to breastfeed their babies while sitting on their beds, usually in response to the baby  
179 crying and being handed over to them by the guardians, or after a nappy change. Guardians would  
180 also help change baby nappies and dispose of them in a basin or bin.

181 As soap was unavailable, mothers and guardians washed their hands with water only (hand-rinsing).  
182 Hand rinsing was observed in 8 (20%) of all observed handwashing opportunities in the PNC ward and  
183 was only practiced before eating. Guardians rinsed hands more often (47%; 7/15) than mothers (4%;  
184 1/26). No mothers washed their hands before breastfeeding or after changing a nappy. The  
185 participants used “unconventional” handwashing facilities, such as bottles, jugs and basins (in 6  
186 instances), despite the presence of dedicated handwashing facilities (sinks) within the sleeping areas  
187 of the wards in both districts. Available HWFs in the PNC ward were only used in 2 of the 8 observed  
188 hand rinsing events. In instances where bottles were used, water was poured into plates or the ground  
189 if it was outside the PNC ward.

190 **Table 3:** Observed Handwashing opportunities and actions taken by mothers and their guardians at  
191 the healthcare facilities

| Handwashing opportunity<br>At PNC ward    | Mothers (n =15) |                        | Guardians (n =15) |                        | Total(n=30) |                        |
|-------------------------------------------|-----------------|------------------------|-------------------|------------------------|-------------|------------------------|
|                                           | # of<br>Opp     | HW-Water<br>only n (%) | # of<br>Opp       | HW-Water<br>only n (%) | # of<br>Opp | HW-Water<br>only n (%) |
| Before breastfeeding                      | 18              | 0(0)                   | .                 | .                      | 18          | 0(0)                   |
| Before eating                             | 5               | 1(20.0)                | 8                 | 7(87.5)                | 13          | 8(61.5)                |
| After nappy change                        | 2               | 0(0)                   | 3                 | 0(0)                   | 5           | 0(0)                   |
| Before taking drugs                       | 1               | 0(0)                   | .                 | .                      | 1           | 0(0)                   |
| Before touching mother                    | .               | .                      | 2                 | 0(0)                   | 2           | 0(0)                   |
| After touching the general<br>surrounding | .               | .                      | 1                 | 0(0)                   | 1           | 0(0)                   |
| Before serving food                       | .               | .                      | 1                 | 0(0)                   | 1           | 0(0)                   |
| <b>Total</b>                              | <b>26</b>       | <b>1(3.8)</b>          | <b>15</b>         | <b>7(46.7)</b>         | <b>41</b>   | <b>8(19.5)</b>         |

192 \*Opp = opportunity; HW = Handwashing

### 193 3.3. WASH conditions and hand hygiene in households

#### 194 3.3.1. WASH conditions at the households

195 Fourteen out of 20 households across both districts collected their water off-premises, mainly from  
196 boreholes which were located within a 500m radius. The majority of the households in Mwanza (n=6)  
197 and Phalombe districts (n=6) had traditional pit latrines without slabs. There were dedicated  
198 handwashing facilities in only two households which had piped water into their yard, both in Mwanza  
199 district. Only one household had water and soap (liquid) at their handwashing facility (Table 4).

200 **Table 4:** WASH conditions at new mothers' households across the two study sites

| WASH facilities at Mother`s<br>Households | Categories               | Mwanza District<br>(n =10) | Phalombe District<br>(n=10) |
|-------------------------------------------|--------------------------|----------------------------|-----------------------------|
| Water Point on premises                   | Yes                      | 3                          | 3                           |
|                                           | No                       | 7                          | 7                           |
| Off-premise Water Point distance          | Within 500m              | 4                          | 6                           |
|                                           | Greater than 500m        | 3                          | 1                           |
| Toilets                                   | No toilet                | 1                          | 4                           |
|                                           | Traditional with slab    | 3                          | .                           |
|                                           | Traditional without slab | 6                          | 6                           |
| Condition of toilet                       | Clean                    | 4                          | 4                           |
|                                           | Unclean                  | 5                          | 2                           |
| Handwashing facilities presence           | Present                  | 2                          | .                           |
|                                           | Absent                   | 8                          | 10                          |
| Handwashing facility type                 | Sink with drain          | 1                          | .                           |
|                                           | Standpipe                | 1                          | .                           |
| Handwashing materials                     | Water and soap           | 1                          | .                           |
|                                           | Water only               | 1                          | .                           |

201 \*The government-run healthcare facility was in Mwanza district while the FBO-run was in Phalombe district



202 **3.3.2. Hand hygiene opportunities and actions in households**

203 A total of 148 hand hygiene opportunities were observed in households. There was no observed  
 204 handwashing with soap during structured observations. Hand rinsing practice was done in 49 (38%) of  
 205 the opportunities, mainly before eating (92%; 23/25) and food preparation (38%; 14/37). Hand rinsing  
 206 during food preparation was mostly done after making a fire using charcoal resulting in visibly dirty  
 207 hands. Hand rinsing practice was also observed before breastfeeding (13%; 6/48) and after nappy  
 208 changes (21%; 3/14) (Table 5).

209 The use of “unconventional” handwashing facilities was also observed at the household level.  
 210 Compounded by a lack of dedicated handwashing facilities, the participants used the following items  
 211 for hand rinsing in the 49 recorded instances: basins (51%); Jug and Basin (14%); cups (14%) and  
 212 buckets without tap (10%) respectively. Taps, pots and plates were used in fewer instances.  
 213 Participants dipped their hands in water when using basins, buckets without taps, pots and plates. In  
 214 3 instances multiple users were observed dipping their hands in the same water. Pouring was done  
 215 when using a jug and basin and cups. Baby care activities (e.g., breastfeeding) at the household level  
 216 were often integrated with other daily activities like laundry, washing dishes, fetching water and  
 217 preparing food. Other members of the household (guardians) also helped with other baby care  
 218 activities such as nappy changing and cord care using an antiseptic (spirit).

219 *Table 5: Observed Handwashing opportunities and actions taken by mothers and their guardians at*  
 220 *the healthcare facility and households*

| Handwashing opportunity Household | Mother (n = 20) |                     | Guardian(n=8) |                     | Total (n =28) |                     |
|-----------------------------------|-----------------|---------------------|---------------|---------------------|---------------|---------------------|
|                                   | # of Opp        | HW-Water only n (%) | # of Opp      | HW-Water only n (%) | # of Opp      | HW-Water only n (%) |
| Before breastfeeding              | 48              | 6(12.5)             | .             | .                   | 48            | 6(12.5)             |
| Before eating                     | 23              | 21(91.3)            | 2             | 2(100)              | 25            | 23(92.0)            |
| Before food preparation           | 25              | 9(36.0)             | 12            | 5(41.6)             | 37            | 14(37.8)            |
| After nappy change                | 14              | 3(21.4)             | .             | .                   | 14            | 3(21.4)             |
| Before cord care                  | .               | .                   | 1             | 0(0)                | 1             | 0(0)                |
| After toilet use                  | 1               | 1(100)              | .             | .                   | 1             | 1(100)              |
| After household chores            | 2               | 2(100)              | .             | .                   | 2             | 2(100)              |
| <b>Total</b>                      | <b>113</b>      | <b>42(37.1)</b>     | <b>15</b>     | <b>7(46.7)</b>      | <b>128</b>    | <b>49(38.3)</b>     |

221 \*Opp = opportunity; HW = Handwashing

222 **3.4. Reported determinants of hand hygiene practices**

223 Thematic analysis of the qualitative data found similar findings of determinants of hand hygiene in  
224 both PNC wards and the home environment (HH); qualitative results are combined across both  
225 settings. We note any setting-specific information in the results.

226 **Table 6: COM-B facilitators and barriers to handwashing with soap among new mothers and**  
227 **guardians in healthcare facilities (PNC) and households (HH)**

| COM-B Components                | Facilitators                                                                                                                                                                                                  | Barriers                                                                                                                                                                                                    |
|---------------------------------|---------------------------------------------------------------------------------------------------------------------------------------------------------------------------------------------------------------|-------------------------------------------------------------------------------------------------------------------------------------------------------------------------------------------------------------|
| <b>Physical Capability</b>      | Some messages and skills from PNC health talks (PNC)                                                                                                                                                          | Irregular PNC health talks (PNC)<br>Tiredness or feeling pain after giving birth (PNC)                                                                                                                      |
| <b>Psychological Capability</b> | Knowledge of handwashing with soap and disease prevention (PNC and HH)<br>Knowledge of handwashing with soap at critical times (PNC and HH)                                                                   |                                                                                                                                                                                                             |
| <b>Physical Opportunity</b>     | Presence of Hand washing facilities (PNC)<br>Water availability (PNC and HH)                                                                                                                                  | Handwashing facility absence and related issues (HH and PNC)<br>Intermittent water supply (PNC and HH)<br>Soap access and affordability (PNC and HH)                                                        |
| <b>Social Opportunity</b>       | Guardians' support in handwashing or Guardians bringing handwashing facilities to Mothers (PNC and HH)<br>Health staff support in handwashing (PNC)<br>Income source and decision-making by self (PNC and HH) | Income source and decision-making by others (PNC and HH)<br>Absence of Guardians during health talks (PNC)                                                                                                  |
| <b>Automatic Motivation</b>     | Clean sanitary facilities (PNC)<br>Handwashing to prevent diseases (PNC and HH)                                                                                                                               | Disgust due to unhygienic sanitary facilities (PNC)<br>Forgetfulness, hunger, negligence for handwashing with soap (PNC and HH)<br>Prioritisation of nurturing pacifying baby over handwashing (PNC and HH) |
| <b>Reflective Motivation</b>    | Money use - prioritisation for the purchase of soap (PNC and HH)<br>Money use - prioritization for the purchase of buckets and handwashing items (PNC and HH)                                                 | No soap use prioritisation for handwashing (PNC and HH)<br>No soap was provided by the hospital (PNC)<br>The perception that using sinks for handwashing is inappropriate (PNC)                             |

\*PNC denotes issues mentioned at the healthcare facility Level and HH denotes issues mentioned at the household level.

### 229 **3.4.1. Capabilities**

#### 230 ***Facilitators***

231 Across most of the interviews, participants demonstrated an understanding of the critical times for  
232 handwashing, demonstrating high levels of action knowledge. They were generally aware of specific  
233 moments, such as after changing diapers and using the toilet, emphasizing the importance of  
234 handwashing.

235 The participants understood the link between handwashing with soap and disease prevention. They  
236 recognised that handwashing can eliminate disease-causing germs. A guardian at the household  
237 emphasised this connection, stating:

238 *"We normally use (wash hands) soap because we want to get rid of the germs that can be in*  
239 *our hands from baby's diapers" [Participant 8, Guardian, Mwanza, Household].*

240 Information about when to wash hands was also repeated during health talks received at the facility,  
241 one mother at the PNC ward said:

242 *"They [Health staff] encouraged mothers to wash hands before breastfeeding the baby, and*  
243 *after changing a diaper" [Participant 6, Mother, Phalombe PNC ward].*

#### 244 ***Barriers***

245 Participants reported that the health talks were not regular and mainly done on discharge, as such  
246 some reported not getting hand hygiene messages during their stay in the PNC wards.

247 The reported fatigue and pain experienced by new mothers in the PNC ward created additional  
248 barriers. The physical strain made it challenging for them to focus on messages (when given out) and  
249 practice handwashing. One participant said:

250 *"The guardian brought me spaghetti for lunch but I ate without washing my hands because I*  
251 *was too lazy to wake up and walk to the sink to wash my hands, so I just started eating with*  
252 *unwashed hands" [Participant 5, Mother, Phalombe, PNC ward]*

### 253 **3.4.2. Opportunities**

#### 254 ***Facilitators***

255 In terms of physical opportunity, sinks with running water were available in all PNC wards but  
256 participants did not use them partly due to restrictions. They however showcased "resourcefulness"  
257 in utilising other means for handwashing (such as bottles and basins) at PNC wards.

258 The use of bottles and basins was also eminent in the households. One guardian in explaining how  
259 they washed hands at the household said:

260 *"Mostly using a bottle, we ask someone to help pour water over hands and wash hands."*  
261 [Participant 6, Guardian, Phalombe, Household].

262 This habit from the household environment could also explain the shunning of using the sinks at the  
263 PNC wards

264 Guardians were also an important component of social opportunity for handwashing with soap – both  
265 at the facility and at home; supporting mothers with HWFs and assisting in handwashing practices. A  
266 guardian at the PNC ward confirmed their role, stating:

267 *"My main role here is to help the mother take care of the baby, such as holding the baby*  
268 *while the mother is taking a bath, giving her water to wash her hands and breasts before*  
269 *carrying the baby"* [Participant 9, Guardian, Mwanza, PNC ward].

270 The observation of health workers practising proper hand hygiene further served as a social  
271 opportunity for mothers and their guardians to adopt similar practices. Participants reported  
272 witnessing health staff adhering to hand hygiene practices, such as glove use in the delivery room and  
273 PNC ward.

#### 274 **Barriers**

275 Even though guardians were an important component of the social opportunity, they were separated  
276 from the new mothers and were absent during health talks. The absence of guardians during health  
277 talks limited information dissemination and potentially hindered the reinforcement of handwashing  
278 practices by the guardians. This separation was reported to be justified by health workers as a means  
279 to avoid disturbance during work hours. A guardian at the PNC wards reported:

280 *"Guardians are not given any information; they are sent out when the mothers are given such*  
281 *information at the time of discharge"* [Participant 3, Guardian, Mwanza, PNC ward].

282 Participants also reported that few sinks were functional and would at times be restricted from using  
283 them. A mother at the PNC ward said:

284 *"We were not allowed to use them because they said some people were not using them*  
285 *properly, for example, washing plates which make the sinks broken with the food scraps"*  
286 [Participant 1, Mother, Mwanza, PNC ward].

287 This possibly added further to the observed shunning of using the sinks for handwashing.

288 Intermittent water supply both at the PNC ward and household levels, emerged as an obstacle. This  
289 was reported to be intense during the dry season in the households. Participants also raised concerns  
290 about the intermittent water supply at the PNC wards, with one stating:

291 *"Water supply is not continuous; the water doesn't take long before it stops."* [Participant 3,  
292 Guardian, Phalombe, PNC ward]

293 Much as some participants would afford to buy soap, its high cost and unavailability at handwashing  
294 facilities in the wards acted as a barrier to consistent handwashing practice. Some cited financial  
295 constraints as a reason for not being able to buy soap, as expressed by one guardian at the household:

296 *"To tell the truth, soap is hard to find because of the small amount I earn; the priority is to buy*  
297 *food to feed my children"* [Participant 5, Guardian, Phalombe, Household].

### 298 **3.4.3. Motivation**

#### 299 ***Facilitators***

300 Several motivational factors were identified that had the potential to encourage handwashing  
301 practices. Some reported that they washed their hands to prevent diseases; this emanated from their  
302 facilitative psychological capability of knowing the link between handwashing with soap and disease  
303 prevention.

304 Participants prioritised money for the purchase of handwashing-related items (soap and buckets). One  
305 guardian at the PNC ward said:

306 *"Yeah, I buy household utensils such as plates, basins, buckets, and everything you know a*  
307 *woman needs in the household"* [Participant 6, Guardian, Phalombe, PNC ward].

308 The participants' reports of allocating financial resources for such purchases, even while at the PNC  
309 ward, showed their reflective motivation to maintain hygiene during the postnatal period. Participants  
310 also considered soap as a priority purchase even in households, as expressed by one Mother:

311 *"So, the money we find we buy food such as maize, we buy soap, clothes for children, paying*  
312 *school fees"* [Participant 4, Mother, Mwanza, Household].

313 This is however negated later; the soap was not prioritised for handwashing as outlined in the barriers,  
314 and handwashing with soap was not observed in the study.

315 The cleanliness of PNC wards, especially in the FBO-run healthcare facility, also served as a  
316 motivational factor. A respondent highlighted this cleanliness, stating:

317 *"The hygiene conditions are good because the toilets are very clean, the postnatal care room*  
318 *is very clean that we can eat our foods there without any problem"* [Participant 1, Guardian,  
319 Phalombe, PNC ward].

320 It is important to note that the FBO-run healthcare facility in Phalombe district is a private hospital,  
321 unlike the one in Mwanza district which is a government-run hospital and is public.

322 **Barriers**

323 Despite these facilitators, barriers to motivation were apparent. Some participants reported  
324 discontentment with the cleanliness of the sanitary facilities in the government-run healthcare facility  
325 and would not use them. Particularly, the handwashing facilities in the toilets in the PNC had no  
326 running water. A mother at the PNC ward said:

327 *“Sometimes I am not willing to go there to take a bath because the bathrooms are dirty”*  
328 [Participant 7, Mother, Mwanza, PNC ward].

329 The participants reported that the sanitary facilities were particularly dirty at night even after being  
330 cleaned twice a day (morning and evening) - the facilities were not cleaned during the night.

331 Some people avoided using HWFs in the PNC ward due to the perception that sinks ought not to be  
332 used for handwashing. For instance, some participants mentioned that they would collect water in a  
333 cup from the sink and wash their hands outside the wards to avoid "dirtying the ward/sink." Others  
334 believed it was inappropriate to wash hands in the sinks because they were also used as drinking water  
335 collection points. Confirming this, one mother said:

336 *“People were washing hands in the sinks but to me, I think it’s not right to wash hands there*  
337 *since we also collect drinking water from the same sinks”* [Participant 4, Mother, Mwanza,  
338 PNC ward].

339 Even though some participants would afford to buy soap, they expressed a challenge in prioritising it  
340 for handwashing, opting to allocate this limited resource for other household purposes. One mother  
341 at the household stated:

342 *“Whenever soap is available, it is used only for washing utensils and bathing, but sometimes*  
343 *where we have no soap, we just take a bath with water only”* [Participant 3, New Mother,  
344 Mwanza Household].

345 A guardian in the PNC ward added on to say:

346 *“We try to save it because if we are to use it for handwashing frequently it means it will not*  
347 *last long because we use the same for bathing the patient and washing her clothes”*  
348 [Participant 5, Guardian, Phalombe, PNC ward].

349 The participants also reported instances where they had forgotten to wash their hands, such as after  
350 visiting the market, using the toilet, before eating particular snacks, or before holding the baby  
351 especially when it was crying. One Mother at the household reflected on her actions and stated:

352 *“Like just now, I have just picked up the baby and started breastfeeding and yet at the*  
353 *hospital, they said we have to wash hands before breastfeeding the baby”* [Participant 10,  
354 New Mother, Mwanza Household].

355 Another mother at the PNC ward added to this and said:

356            *“...if it [the baby] suddenly wakes up and starts crying, I may not think of going to wash*  
357            *hands first but I can just start breastfeeding the baby....”*. [Participant 2, New Mother,  
358            Phalombe, PNC ward]

#### 359 **4.0. Discussion**

360 The study revealed low compliance with handwashing practices among new mothers and guardians  
361 in healthcare facilities and household settings despite generally high capability (knowledge) about  
362 handwashing with soap. Opportunity for handwashing emerged as a major barrier to improved hand  
363 hygiene – both in terms of low physical opportunity due to limited soap and irregular water and social  
364 opportunity due to the exclusion of guardians from health talks during patient discharge. Motivation  
365 for handwashing was mixed, with mothers prioritising money for handwashing-related items such as  
366 buckets, basins and soap however, soap was not prioritised for handwashing. Mothers also forgot to  
367 wash hands when tending to their baby when it was crying. These findings are consistent with existing  
368 literature on hand hygiene during the neonatal period, highlighting the challenge of translating  
369 knowledge into practice (36,48). The observed missed opportunities for handwashing in both settings  
370 showcase the need for targeted interventions to improve handwashing practices (27,35).

371 The findings also provide insights into the handwashing practices among new mothers and their  
372 guardians in healthcare facilities and household settings. Generally, participants utilised fewer  
373 opportunities to wash their hands at the healthcare facility than at the household, raising important  
374 considerations regarding the environmental and contextual factors influencing hand hygiene  
375 behaviours, also raised by Tamene *et al* (2023)(33) and Dreibelbis *et al* (2013)(49).

376 Participants at the healthcare facility faced limited opportunities for hand washing by being told not  
377 to use the handwashing facilities, similar to findings by Mangochi *et al* (2022) in their study on hand  
378 hygiene practice in Malawian neonatal healthcare units (50). Healthcare workers are the ones that  
379 normally use the HWFs within the PNC wards however this practice limits effective Infection  
380 Prevention and control which warrants the involvement of everyone within the healthcare facility  
381 including the new mothers and their guardians (51). The limited use of HWFs was also compounded  
382 by intermittent water supply and few functional HWFs among others, a common scenario in Low- and  
383 Middle-Income countries (50,52–54). Despite being motivated to use hygienic facilities, some  
384 participants were hesitant to use the sinks for handwashing because they also served as points for  
385 collecting drinking water. They wanted to keep these points clean for drinking purposes. It's important  
386 to recognize that patients in healthcare facilities have limited control over their environment.  
387 Therefore, facilities need to ensure that they provide appropriate handwashing facilities that are  
388 specific to the context and enable the behaviours they are promoting (51,55).

389 A refined approach to postnatal care, recognising the physical vulnerability and specific needs of  
390 mothers immediately after childbirth is needed (27,30). Mothers were too tired or sore to move from  
391 the bed to handwashing facilities that were available in the PNC ward. The “unconventional” HWFs  
392 and their use by guardians represent an adaption to this reality, with guardians bringing portable  
393 objects to mothers to use to clean their hands. Guardians, therefore, play an important role in  
394 facilitating hand hygiene for new mothers (27,37,50,56). However, the separation of guardians from  
395 new mothers during crucial health talks indicates a missed opportunity for reinforcing these essential  
396 hygiene practices. While most interventions traditionally target healthcare workers and mothers, this  
397 finding supports the need for inclusive interventions involving patient guardians or caretakers  
398 (12,14,15). Moreover, guardians who are actively involved in various aspects of care can serve as key



399 influencers in promoting handwashing practices (23). Recognizing and reinforcing the role of  
400 guardians in the continuum of care is therefore essential (46,57).

401

402 The findings regarding handwashing practices within the household further shed light on some key  
403 contextual considerations. Mothers displayed varied levels of handwashing, with some engaging in  
404 this practice only when they perceived their hands as visibly dirty, especially during cooking activities,  
405 as also reported in other studies (37,58). This observation shows a potential gap in awareness and  
406 habitual handwashing behaviours within the household setting. Effective handwashing practice is also  
407 challenging given the concurrent management of baby care and other household tasks by new  
408 mothers. This is a common scenario in the African context and often results in instances where  
409 handwashing is overlooked(37,59,60). To promote consistent handwashing practices, interventions  
410 could be tailored to these specific dynamics - placing HWFs near areas where caregiving and food-  
411 related activities occur could serve as a practical solution (61–65). Implementing reminders, such as  
412 visual cues associated with the baby's care routine, may prompt mothers and guardians to wash their  
413 hands regularly (41,60). Other innovative approaches, such as custom-made hand sanitisers attached  
414 to baby accessories or worn by mothers, could provide a convenient means for incorporating hand  
415 hygiene into the routine of baby care (66). This could prove effective in instances where immediate  
416 responses to a baby's needs take precedence over handwashing.

417 The identified barrier of limited affordability and prioritisation of soap for other uses other than  
418 handwashing should be addressed. In resource-constrained settings, where households may face  
419 economic challenges, promoting hand hygiene becomes linked with addressing broader  
420 socioeconomic factors (37,48,67). One potential solution for encouraging the prioritisation of soap  
421 for handwashing is through approaches that emphasize the dual functionality of soap for personal  
422 hygiene and broader domestic purposes (68). Pointing out the role of soap in overall health and well-  
423 being, not just hand hygiene may change perceptions of soap as a scarce resource. Such messages  
424 may also be integrated into existing hospital or community programs, such as maternal and child  
425 health initiatives (68). Moreover, community-based initiatives or partnerships with local organizations  
426 could explore ways to make soap more accessible, through for example subsidised programs or  
427 collaborations with soap manufacturers (69). Empowering communities to produce low-cost, locally-  
428 made soaps could be another option (70).

#### 429 **4.1. Limitations of the study**

430 One limitation of the study was the few recorded observed opportunities for handwashing because  
431 mothers often slept for extended periods in the PNC wards. This restricted the researchers' ability to  
432 capture a comprehensive picture of handwashing practices throughout the day. Even though this is a  
433 reflection of what happens during this period, future studies may benefit from employing alternative  
434 data collection methods, for example, the use of cameras or adjusting observation schedules to  
435 capture a wider range of activities and behaviours related to hand hygiene. Even though the study  
436 employed the support of direct observations to counter this, it is possible that some of the observed  
437 behaviours were modified in response to being observed (Hawthorne effect). As with any single-site  
438 study, the generalisability of the findings may be limited to the specific context and population under  
439 investigation. While the study provides insights into handwashing practices among new mothers and

440 guardians in Malawi, caution should be exercised when extrapolating the results to other settings or  
441 populations with different sociodemographic characteristics.

## 442 **5.0. Conclusion**

443 Our study points to the need for targeted interventions to improve hand hygiene practices among  
444 new mothers and guardians in both healthcare facilities and household environments. Despite  
445 adequate knowledge, compliance with handwashing practices remains low due to limited  
446 opportunities and mixed motivations. Factors such as limited access to handwashing facilities,  
447 intermittent water supply, soap affordability and use, physical strain on new mothers, and concurrent  
448 caregiving and household tasks further complicate handwashing with soap practices. Strategies to  
449 address these challenges include empowering and utilising patient guardians, strategic placement of  
450 handwashing facilities, implementing reminders, and innovative approaches to promote soap use  
451 prioritisation for handwashing. Collaborative efforts involving healthcare providers, communities, and  
452 policymakers are essential to implement and sustain interventions aimed at promoting handwashing  
453 with soap during the postnatal period.

454

## 455 **6.0. Acknowledgements**

456 We extend our gratitude to all participants who generously shared their time and experiences, without  
457 whom this study would not have been possible. We acknowledge the support and cooperation  
458 received from the healthcare facilities and communities involved in this research. Special thanks to  
459 the research enumerators for their dedicated efforts in data collection and management.

## 460 **7.0. Funding**

461 The study received funding from Reckitt Global Hygiene Institute (RGHI) grant number RIN-2021-005.  
462 Views expressed here reflect those of the authors and not necessarily those of funder. The funder  
463 played no role in the design, analysis, or decision to publish.

## 464 **8.0. Declaration of conflict of interest**

465 The authors declare no conflicts of interest

## 9.0. References

1. WHO. Maternal mortality [Internet]. 2019 [cited 2022 Jun 29]. Available from: <https://www.who.int/news-room/fact-sheets/detail/maternal-mortality>
2. WHO. Newborn Mortality [Internet]. 2022 [cited 2022 Jun 28]. Available from: <https://www.who.int/news-room/fact-sheets/detail/levels-and-trends-in-child-mortality-report-2021>
3. WHO. Atlas of African Health Statistics 2022: Health situation analysis of the WHO African Region — Summary report [Internet]. Brazzaville; 2022. Available from: <http://apps.who.int/bookorders>.
4. Sharrow D, Hug L, You D, Alkema L, Black R, Cousens S, et al. Global, regional, and national trends in under-5 mortality between 1990 and 2019 with scenario-based projections until 2030: a systematic analysis by the UN Inter-agency Group for Child Mortality Estimation. *Lancet Glob Health*. 2022 Feb 1;10(2):e195–206.
5. Say L, Chou D, Gemmill A, Tunçalp Ö, Moller AB, Daniels J, et al. Global causes of maternal death: A WHO systematic analysis. *Lancet Glob Health*. 2014;2(6).
6. Freeman MC, Stocks ME, Cumming O, Jeandron A, Higgins JPT, Wolf J, et al. Hygiene and health: systematic review of handwashing practices worldwide and update of health effects. *Trop Med Int Health [Internet]*. 2014 [cited 2022 Jun 30];19(8):906–16. Available from: <https://pubmed.ncbi.nlm.nih.gov/24889816/>
7. Warren-Gash C, Fragaszy E, Hayward AC. Hand hygiene to reduce community transmission of influenza and acute respiratory tract infection: A systematic review. *Influenza Other Respir Viruses*. 2013 Sep;7(5):738–49.
8. McGuinness SL, Barker SF, O'Toole J, Cheng AC, Forbes AB, Sinclair M, et al. Effect of hygiene interventions on acute respiratory infections in childcare, school and domestic settings in low- and middle-income countries: a systematic review. *Trop Med Int Health [Internet]*. 2018 [cited 2022 Jun 30];23(8):816–33. Available from: <https://pubmed.ncbi.nlm.nih.gov/29799658/>
9. Vo TS, Vo TTTN, Vo TTBC. Handwashing in against of coronavirus disease 2019 infection. *Journal of Research in Clinical Medicine [Internet]*. 2020 May 18 [cited 2023 Nov 29];8(1):19–19. Available from: <https://jrjm.tbzmed.ac.ir/Article/jrcm-31807>
10. Haque M. Handwashing in averting infectious diseases: Relevance to COVID-19. *Journal of Population Therapeutics and Clinical Pharmacology [Internet]*. 2020 Jul 12 [cited 2023 Nov 29];27(SP1):e37–52. Available from: <https://jptcp.com/index.php/jptcp/article/view/711/691>
11. WHO. Postnatal care of the mother and newborn 2013 [Internet]. 2014 [cited 2022 Jul 5]. Available from: <https://apps.who.int/iris/bitstream/handle/10665/97603/?sequence=1>

12. Gon G, de Barra M, Dansero L, Nash S, Campbell OMR. Birth attendants' hand hygiene compliance in healthcare facilities in low and middle-income countries: a systematic review. *BMC Health Serv Res* [Internet]. 2020 Dec 1 [cited 2022 Jun 30];20(1):1–16. Available from: <https://bmchealthservres.biomedcentral.com/articles/10.1186/s12913-020-05925-9>
13. Price L, Macdonald J, Gozdzielewska L, Howe T, Flowers P, Shepherd L, et al. Interventions to improve healthcare workers' hand hygiene compliance: A systematic review of systematic reviews. *Infect Control Hosp Epidemiol* [Internet]. 2018 Dec 1 [cited 2022 Jun 30];39(12):1449–56. Available from: <https://pubmed.ncbi.nlm.nih.gov/30526716/>
14. Greenland K, Iradati E, Ati A, Maskoen YY, Aunger R. The context and practice of handwashing among new mothers in Serang, Indonesia: A formative research study. *BMC Public Health* [Internet]. 2013 Sep 11 [cited 2022 Jun 30];13(1):1–11. Available from: <https://bmcpublikehealth.biomedcentral.com/articles/10.1186/1471-2458-13-830>
15. Parveen S, Nasreen S, Allen J V., Kamm KB, Khan S, Akter S, et al. Barriers to and motivators of handwashing behavior among mothers of neonates in rural Bangladesh. *BMC Public Health* [Internet]. 2018 Apr 1 [cited 2023 May 3];18(1):1–13. Available from: <https://doaj.org/article/b2397905322745f3972155b9495ebf9c>
16. Pavani K. Ram. Washing hands to save newborn lives – Healthy Newborn Network [Internet]. 2014 [cited 2022 Jun 22]. Available from: <https://www.healthynewbornnetwork.org/blog/washing-hands-to-save-newborn-lives/>
17. Kambala C, Lohmann J, Mazalale J, Brenner S, De Allegri M, Muula AS, et al. How do Malawian women rate the quality of maternal and newborn care? Experiences and perceptions of women in the central and southern regions. *BMC Pregnancy Childbirth* [Internet]. 2015 Aug 15 [cited 2022 Jun 28];15(1):1–19. Available from: <https://bmcpregnancychildbirth.biomedcentral.com/articles/10.1186/s12884-015-0560-x>
18. Gondwe G. UNICEF Malawi. 2020 [cited 2022 Jun 30]. A father's role in childcare: Elias's story. Available from: <https://www.unicef.org/malawi/stories/fathers-role-childcare-eliass-story>
19. Mhango P, Chipeta E, Muula AS, Robb-McCord J, White PM, Litch JA, et al. Implementing the Family-Led Care model for preterm and low birth weight newborns in Malawi: Experience of healthcare workers. *Afr J Prim Health Care Fam Med*. 2020;12(1).
20. Nalule Y, Buxton H, Macintyre A, Ir P, Pors P, Samol C, et al. Hand hygiene during the early neonatal period: A mixed-methods observational study in healthcare facilities and households in rural cambodia. *Int J Environ Res Public Health* [Internet]. 2021 May 1 [cited 2022 Jun 22];18(9). Available from: [/pmc/articles/PMC8122667/](https://pmc/articles/PMC8122667/)
21. Chidziwisano M, Beattie K, Tilley TK, Kambala E, Morse C, Panulo M, et al. Process Evaluation of "The Hygienic Family" Intervention: A Community-Based Water, Sanitation, and Hygiene Project in Rural Malawi. *International Journal of Environmental Research and Public Health* 2022, Vol 19, Page 6771 [Internet]. 2022 Jun 1 [cited 2023 Dec 12];19(11):6771. Available from: <https://www.mdpi.com/1660-4601/19/11/6771/htm>

22. Mukunya D, Haaland MES, Tumwine JK, Tylleskar T, Nankabirwa V, Moland KM. "the cord is the child": Meanings and practices related to umbilical cord care in Central Uganda. *BMC Pediatr* [Internet]. 2020 Mar 4 [cited 2022 Jul 5];20(1):1–9. Available from: <https://bmcpediatr.biomedcentral.com/articles/10.1186/s12887-020-2002-9>
23. Basu L, Frescas R, Kiwelu H. Patient guardians as an instrument for person centered care. *Global Health* [Internet]. 2014 May 8 [cited 2024 Jan 17];10(1):1–3. Available from: <https://globalizationandhealth.biomedcentral.com/articles/10.1186/1744-8603-10-33>
24. Elizabeth G. The burden of the caring role: Adaptation of family members to the caring role in surgical wards at a tertiary hospital in Malawi. *International Journal of Nursing and Midwifery*. 2022 Jan 31;14(1):1–9.
25. Hoffnan M, Mofolo I, Salima C, Hoffman I, Zadrozny S, Martinson F, et al. Utilization of family members to provide hospital care in Malawi: the role of hospital guardians. *Malawi Medical Journal* [Internet]. 2012 Dec;24(4). Available from: [www.mmj.medcol.mw](http://www.mmj.medcol.mw)
26. Gwaza E, Maluwa V, Kapito E, Sakala B, Mwale R, Haruzivishe C, et al. Patient Guardian: Concept Analysis. *International Journal of Innovative Research and Development*. 2017 Aug 31;6(8).
27. Nalule Y, Buxton H, Macintyre A, Ir P, Pors P, Samol C, et al. Hand hygiene during the early neonatal period: A mixed-methods observational study in healthcare facilities and households in rural cambodia. *Int J Environ Res Public Health* [Internet]. 2021 May 1 [cited 2023 May 3];18(9):4416. Available from: <https://www.mdpi.com/1660-4601/18/9/4416/htm>
28. Park JY, Pardosi JF, Seale H. Examining the inclusion of patients and their family members in infection prevention and control policies and guidelines across Bangladesh, Indonesia, and South Korea. *Am J Infect Control*. 2020 Jun;48(6):599–608.
29. Nalule Y, Pors P, Samol C, Ret S, Leang S, Ir P, et al. A controlled before-and-after study of a multi-modal intervention to improve hand hygiene during the peri-natal period in Cambodia. *Scientific Reports* 2022 12:1 [Internet]. 2022 Nov 16 [cited 2023 Dec 12];12(1):1–13. Available from: <https://www.nature.com/articles/s41598-022-23937-9>
30. Nalule Y, Buxton H, Flynn E, Oluyinka O, Sara S, Cumming O, et al. Hygiene along the continuum of care in the early post-natal period: An observational study in Nigeria. *BMC Pregnancy Childbirth* [Internet]. 2020 Oct 6 [cited 2022 Jun 28];20(1):1–11. Available from: <https://bmcpregnancychildbirth.biomedcentral.com/articles/10.1186/s12884-020-03282-3>
31. Jacqueline D. Beyond tippy-taps: The role of enabling products in scaling up and sustaining handwashing. *Waterlines*. 2010 Oct;29(4):304–14.
32. Hulland KRS, Leontsini E, Dreibelbis R, Unicomb L, Afroz A, Dutta NC, et al. Designing a handwashing station for infrastructure-restricted communities in Bangladesh using the integrated behavioural model for water, sanitation and hygiene interventions (IBM-WASH). *BMC Public Health*. 2013;13(1).

33. Tamene A, Habte A, Tagesse M, Endale F, Melis T, Sewalem ZW, et al. Exploring associations between household environmental factors and handwashing with essential agents in sub-Saharan Africa. *PLoS One* [Internet]. 2023 Jun 1 [cited 2023 Dec 12];18(6):e0286735. Available from: <https://journals.plos.org/plosone/article?id=10.1371/journal.pone.0286735>
34. Loftus MJ, Guitart C, Tartari E, Stewardson AJ, Amer F, Bellissimo-Rodrigues F, et al. Hand hygiene in low- and middle-income countries. *International Journal of Infectious Diseases*. 2019 Sep 1;86:25–30.
35. Horng LM, Unicomb L, Alam MU, Halder AK, Shoab AK, Ghosh PK, et al. Healthcare worker and family caregiver hand hygiene in Bangladeshi healthcare facilities: results from the Bangladesh National Hygiene Baseline Survey. *J Hosp Infect* [Internet]. 2016 Nov 1 [cited 2023 Dec 12];94(3):286–94. Available from: <https://pubmed.ncbi.nlm.nih.gov/27665311/>
36. Curtis VA, Danquah LO, Aunger R V. Planned, motivated and habitual hygiene behaviour: an eleven country review. *Health Educ Res* [Internet]. 2009 Aug [cited 2023 Nov 29];24(4):655–73. Available from: <https://pubmed.ncbi.nlm.nih.gov/19286894/>
37. Parveen S, Ram PK. Barriers to and Motivators of Handwashing Behavior in the Neonatal Period Findings from a Formative Research Study on Maternal Handwashing in Habiganj, Bangladesh [Internet]. 2012 [cited 2023 Dec 12]. Available from: <https://www.mchip.net/sites/default/files/Habiganj%20Handwashing%20Formative%20Study.pdf>
38. Nizame FA, Unicomb L, Sanghvi T, Roy S, Nuruzzaman M, Ghosh PK, et al. Handwashing before food preparation and child feeding: a missed opportunity for hygiene promotion. *Am J Trop Med Hyg* [Internet]. 2013 Dec [cited 2023 Dec 12];89(6):1179–85. Available from: <https://pubmed.ncbi.nlm.nih.gov/24080638/>
39. White S, Thorseth AH, Dreibelbis R, Curtis V. The determinants of handwashing behaviour in domestic settings: An integrative systematic review. *Int J Hyg Environ Health*. 2020 Jun 1;227:113512.
40. Onubogu CU, Ugochukwu EF, Onwumere UO, Okeke KN, Onubogu CU, Ugochukwu EF, et al. Hand Washing and Other Hygienic Cord Care Practices among Mothers in Nnewi, Nigeria Paediatric Infectious Diseases View project Hand Washing and Other Hygienic Cord Care Practices among Mothers in Nnewi, Nigeria. Article in *Journal of Advances in Medicine and Medical Research* [Internet]. 2021 [cited 2022 Jul 5];33(24):168–76. Available from: <https://www.researchgate.net/publication/358149180>
41. Ram PK, Nasreen S, Kamm K, Allen J, Kumar S, Rahman MA, et al. Impact of an Intensive Perinatal Handwashing Promotion Intervention on Maternal Handwashing Behavior in the Neonatal Period: Findings from a Randomized Controlled Trial in Rural Bangladesh. *Biomed Res Int*. 2017;2017.
42. Grover E, Hossain MK, Uddin S, Venkatesh M, Ram PK, Dreibelbis R. Social Influence on Handwashing with Soap: Results from a Cluster Randomized Controlled Trial in Bangladesh.

- Am J Trop Med Hyg [Internet]. 2018 [cited 2023 Jul 19];99(4):934. Available from: </pmc/articles/PMC6159569/>
43. WHO. Maternal mortality ratio (modeled estimate, per 100,000 live births) - Malawi | Data [Internet]. 2020 [cited 2024 May 8]. Available from: <https://data.worldbank.org/indicator/SH.STA.MMRT?locations=MW>
  44. WHO. Mortality rate, neonatal (per 1,000 live births) - Malawi | Data [Internet]. 2021 [cited 2024 May 8]. Available from: <https://data.worldbank.org/indicator/SH.DYN.NMRT?locations=MW>
  45. World Health Organization. The World Health Report 2005 : make every mother and child count. World Health Organization; 2005. 229 p.
  46. PMNCH. Knowledge Summary 2: Enable the continuum of Care [Internet]. 2010 [cited 2024 Jan 18]. Available from: <https://pmnch.who.int/docs/librariesprovider9/meeting-reports/knowledge-summary-2.pdf>
  47. Michie S, van Stralen MM, West R. The behaviour change wheel: A new method for characterising and designing behaviour change interventions. Implementation Science [Internet]. 2011 Apr 23 [cited 2023 Dec 12];6(1):1–12. Available from: <https://implementationscience.biomedcentral.com/articles/10.1186/1748-5908-6-42>
  48. Aunger R, Curtis V. Behaviour Centred Design: towards an applied science of behaviour change. Health Psychol Rev. 2016 Oct 1;10(4):425–46.
  49. Dreibelbis R, Winch PJ, Leontsini E, Hulland KRS, Ram PK, Unicomb L, et al. The Integrated Behavioural Model for Water, Sanitation, and Hygiene: A systematic review of behavioural models and a framework for designing and evaluating behaviour change interventions in infrastructure-restricted settings. BMC Public Health [Internet]. 2013 Oct 26 [cited 2024 Feb 16];13(1):1–13. Available from: <https://bmcpublichealth.biomedcentral.com/articles/10.1186/1471-2458-13-1015>
  50. Mangochi H, Tolhurst R, Simpson V, Kawaza K, Chidziwisano K, Feasey NA, et al. A qualitative study exploring hand hygiene practices in a neonatal unit in Blantyre, Malawi: implications for controlling healthcare-associated infections. Wellcome Open Res [Internet]. 2022 [cited 2024 Feb 16];7. Available from: </pmc/articles/PMC10170178/>
  51. Pittet D, World Health Organization. Hand hygiene for all initiative: Improving access and behaviour in health care facilities. World Health Organization [Internet]. 2020 [cited 2024 Sep 20];2020(June):303–12. Available from: [http://whqlibdoc.who.int/publications/2009/9789241597906\\_eng.pdf](http://whqlibdoc.who.int/publications/2009/9789241597906_eng.pdf)
  52. Kanyangarara M, Allen S, Jiwani SS, Fuente D. Access to water, sanitation and hygiene services in health facilities in sub-Saharan Africa 2013-2018: Results of health facility surveys and implications for COVID-19 transmission. BMC Health Serv Res [Internet]. 2021 Jun 25 [cited 2024 Feb 16];21(1):601. Available from: <https://bmchealthservres.biomedcentral.com/articles/10.1186/s12913-021-06515-z>

53. WHO. Water, sanitation and hygiene in health care facilities: practical steps to achieve universal access. [Internet]. 2019 [cited 2024 Feb 16]. Available from: <https://www.who.int/publications-detail-redirect/9789241515511>
54. Nzanga M, Panulo M, Morse T, Chidziwisano K. Adherence to Hand Hygiene among Nurses and Clinicians at Chiradzulu District Hospital, Southern Malawi. *Int J Environ Res Public Health* [Internet]. 2022 Sep 1 [cited 2024 Oct 10];19(17). Available from: <https://pubmed.ncbi.nlm.nih.gov/36078689/>
55. WHO guidelines on hand hygiene in health care : first global patient safety challenge : clean care is safer care. WHO; 2010. 262 p.
56. Biswal M, Angrup A, Rajpoot S, Kaur R, Kaur K, Kaur H, et al. Hand hygiene compliance of patients' family members in India: importance of educating the unofficial 'fourth category' of healthcare personnel. *Journal of Hospital Infection*. 2020 Apr 1;104(4):425–9.
57. WHO, UNPF, World Bank, UNICEF. Pregnancy, childbirth, postpartum and newborn care: a guide for essential practice. 3rd ed. World Health Organization; 2015. 184 p.
58. WSP. Are your hands clean enough? Study Findings on Handwashing With Soap Behaviour in Kenya [Internet]. Africa; [cited 2024 Feb 16]. Available from: [https://www.pseau.org/outils/ouvrages/wsp\\_africa\\_are\\_your\\_hands\\_clean\\_enough\\_2009.pdf](https://www.pseau.org/outils/ouvrages/wsp_africa_are_your_hands_clean_enough_2009.pdf)
59. Waterhouse P, Hill AG, Hinde A. Combining work and child care: The experiences of mothers in Accra, Ghana. *Dev South Afr* [Internet]. 2017 Nov 2 [cited 2024 Feb 16];34(6):771–86. Available from: <https://www.tandfonline.com/doi/abs/10.1080/0376835X.2017.1323627>
60. Greenland K, Iradati E, Ati A, Maskoen YY, Aunger R. The context and practice of handwashing among new mothers in Serang, Indonesia: A formative research study. *BMC Public Health* [Internet]. 2013 Sep 11 [cited 2024 Feb 16];13(1):1–11. Available from: <https://link.springer.com/articles/10.1186/1471-2458-13-830>
61. Mwapasa T, Chidziwisano K, Lally D, Morse T. Hygiene in early childhood development centres in low-income areas of Blantyre, Malawi. *Int J Environ Health Res* [Internet]. 2023 Aug 3 [cited 2024 Feb 16];33(8):751–67. Available from: <https://www.tandfonline.com/doi/abs/10.1080/09603123.2022.2048802>
62. Mumma JAO, Cumming O, Simiyu S, Czerniewska A, Aseyo RE, Muganda DN, et al. Infant Food Hygiene and Childcare Practices in Context: Findings from an Urban Informal Settlement in Kenya. *Am J Trop Med Hyg* [Internet]. 2020 [cited 2024 Feb 16];102(1):220. Available from: </pmc/articles/PMC6947802/>
63. Nizame FA, Unicomb L, Sanghvi T, Roy S, Nuruzzaman M, Ghosh PK, et al. Handwashing before Food Preparation and Child Feeding: A Missed Opportunity for Hygiene Promotion. *Am J Trop Med Hyg* [Internet]. 2013 Dec 12 [cited 2024 Feb 16];89(6):1179. Available from: </pmc/articles/PMC3854896/>



64. Chidziwisano K, Tilley E, Morse T. Self-reported versus observed measures: Validation of child caregiver food hygiene practices in rural malawi. *Int J Environ Res Public Health*. 2020 Jun 2;17(12):1–14.
65. Chidziwisano K, Slekiene J, Mosler HJ, Morse T. Improving complementary food hygiene behaviors using the risk, attitude, norms, ability, and self-regulation approach in rural Malawi. *American Journal of Tropical Medicine and Hygiene*. 2020;102(5):1104–15.
66. Ram PK, Begum F, Crabtree-Ide C, Uddin MR, Weaver AM, Golam Dostogir Harun M, et al. Waterless Hand Cleansing with Chlorhexidine during the Neonatal Period by Mothers and Other Household Members: Findings from a Randomized Controlled Trial. *Am J Trop Med Hyg* [Internet]. 2020 Nov 1 [cited 2024 Feb 16];103(5):2116. Available from: </pmc/articles/PMC7646780/>
67. Afolabi RF, Palamuleni ME. Exploring determinants of under-5 stunting in Malawi using a generalised linear mixed model. *South African Journal of Child Health* [Internet]. 2021 [cited 2024 Jan 15];15(1):18–24. Available from: [http://www.scielo.org.za/scielo.php?script=sci\\_arttext&pid=S1999-76712021000100004&lng=en&nrm=iso&tlng=en](http://www.scielo.org.za/scielo.php?script=sci_arttext&pid=S1999-76712021000100004&lng=en&nrm=iso&tlng=en)
68. Brial E, Aunger R, Muangi WC, Baxter W. Development of a novel hand cleansing product for low-income contexts: The case of tab soap. *PLoS One* [Internet]. 2023 May 1 [cited 2024 Feb 16];18(5):e0283741. Available from: <https://journals.plos.org/plosone/article?id=10.1371/journal.pone.0283741>
69. UNICEF, WHO. State of the World’s Hand Hygiene: A global call to action to make hand hygiene a priority in policy and practice [Internet]. New York; 2021 [cited 2024 Feb 16]. Available from: <https://apps.who.int/iris/bitstream/handle/10665/350184/9789240036444-eng.pdf>
70. Azme SNK, Yusoff NSIM, Chin LY, Mohd Y, Hamid RD, Jalil MN, et al. Recycling waste cooking oil into soap: Knowledge transfer through community service learning. *Cleaner Waste Systems*. 2023 Apr 1;4:100084.
